# Supplementary material for: The Predictive Value of Serum ACE2 and TMPRSS2 Concentrations in Patients with COVID-19—A Prospective Pilot Study
Source: MDPI journal article supplement (doi:10.3390/jpm12040622), 2022-04-12
Supplement: s1 [file s1]

**Supplemental Information Table Of Content:**

**SUPPLEMENTAL INFORMATION TABLE OF CONTENT: ..... 1**

**SUPPLEMENTAL FIGURES AND TABLES..... 2**

FIGURE S1 .....3

FIGURE S2 .....4

TABLE S1.....4

TABLE S2.....5

TABLE S3.....7

TABLE S4.....8

TABLE S5.....9

TABLE S6.....10

TABLE S7.....11

## Supplemental figures and tables

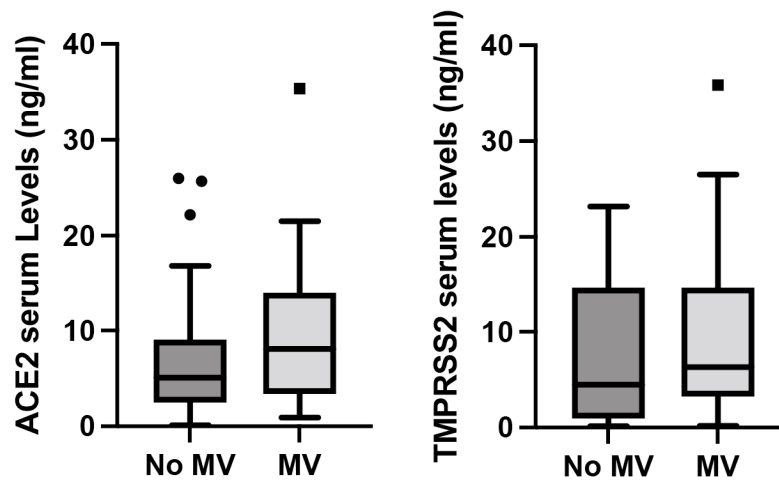

**Figure S1.** ACE2 and TMPRSS2 serum levels at presentation for patients who ultimately required mechanical ventilation (MV) and those who did not (no MV).

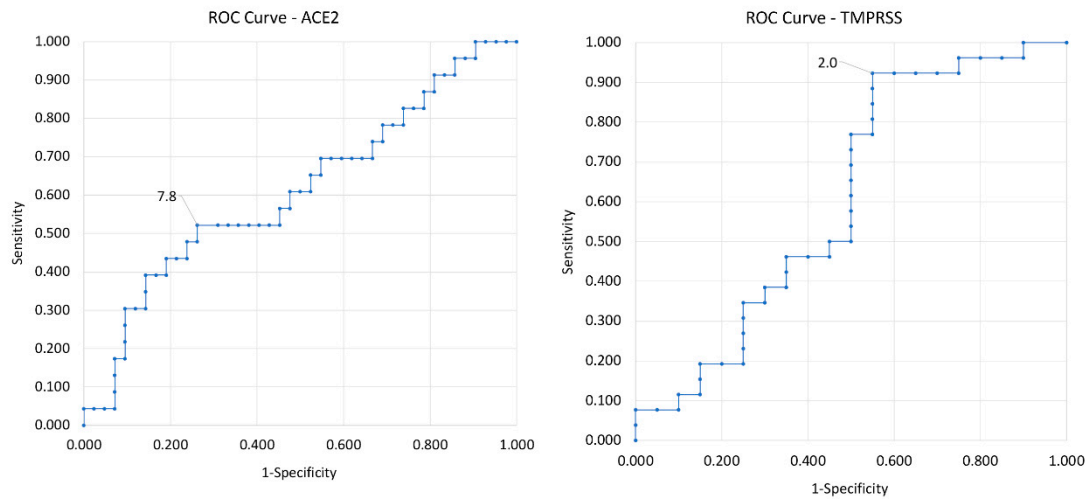

**Figure S2. ROC curves for ACE2 and TMPRSS2 levels early in COVID-19 for correlation with need for mechanical ventilation.** ROC analysis dichotomized ACE2 levels in order to predict the risk for requiring mechanical ventilation. ACE2 levels that produced the highest sensitivity & specificity for predicting the need for mechanical ventilation was above 7.8ng/mL. For TMPRSS2, expression levels that produced the highest sensitivity & specificity for predicting the need for mechanical ventilation was above 2ng/mL.

**Table S1. Association between early sample ACE2 or TMPRSS2 serum expression and clinical characteristics in COVID-19 patients**

| Variable            |        | ACE2                 | p-value      | TMPRSS2              | p-value |
|---------------------|--------|----------------------|--------------|----------------------|---------|
| <b>Hypertension</b> | Yes    | 6.24<br>(2.92-12.39) | 0.602        | 6.93<br>(2.13-15.13) | 0.698   |
|                     | No     | 5.59<br>(3.60-9.99)  |              | 5.52<br>(2.59-13.55) |         |
| <b>Diabetes</b>     | Yes    | 6.60<br>(3.50-12.56) | 0.446        | 6.07<br>(2.07-15.62) | 0.572   |
|                     | No     | 5.27<br>(2.44-10.01) |              | 5.81<br>(2.24-13.95) |         |
| <b>Dyslipidemia</b> | Yes    | 9.15<br>(5.66-15.80) | <b>0.002</b> | 8.34<br>(3.73-16.28) | 0.099   |
|                     | No     | 4.13<br>(2.45-7.95)  |              | 4.75<br>(1.80-13.62) |         |
| <b>Sex</b>          | Female | 5.27<br>(3.06-12.11) | 0.976        | 3.58<br>(1.04-14.10) | 0.549   |
|                     | Male   | 5.67<br>(3.01-10.13) |              | 6.33<br>(2.43-14.46) |         |

**Table S2. Clinical outcomes in COVID-19 patients who required mechanical ventilation compared to those who did not**

|                                   | <b>Non-ventilation<br/>n=42<br/>n (%)</b> | <b>Ventilation<br/>n=30<br/>n (%)</b> | <b>p value</b>    |
|-----------------------------------|-------------------------------------------|---------------------------------------|-------------------|
| <b>Mortality</b>                  | 4 (9.5%)                                  | 11 (36.7%)                            | <b>0.005</b>      |
| <b>Hospitalization &gt;7 days</b> | 20 (47.6%)                                | 30 (100.0%)                           | <b>&lt;0.001</b>  |
| <b>Inotropic support</b>          | 0 (0.0%)                                  | 29 (96.7%)                            | <b>&lt; 0.001</b> |
| <b>Acute renal failure*</b>       | 7 (16.7%)                                 | 17 (58.6%)                            | <b>&lt; 0.001</b> |
| <b>RRT</b>                        | 0 (0.0%)                                  | 10 (33.3%)                            | <b>&lt; 0.001</b> |
| <b>ECMO</b>                       | 0 (0.0%)                                  | 8 (26.7%)                             | <b>&lt; 0.001</b> |
| <b>Blood products</b>             | 5 (11.9%)                                 | 20 (66.7%)                            | <b>&lt; 0.001</b> |
| <b>DIC</b>                        | 0 (0.0%)                                  | 3 (10.0%)                             | <b>0.036</b>      |
| <b>PE/DVT</b>                     | 1 (2.4%)                                  | 7 (23.3%)                             | <b>0.005</b>      |
| <b>HIT</b>                        | 0 (0.0%)                                  | 3 (10.0%)                             | <b>0.036</b>      |
| <b>Bleeding</b>                   | 1 (2.4%)                                  | 18 (60.0%)                            | <b>&lt; 0.001</b> |
| <b>Pneumothorax</b>               | 0 (0.0%)                                  | 3 (10.0%)                             | <b>0.036</b>      |
| <b>Sepsis</b>                     | 2 (4.8%)                                  | 26 (86.7%)                            | <b>&lt; 0.001</b> |

\*Acute renal failure – increase in creatinine from baseline in 50%.

DIC, Disseminated intravascular coagulation; DVT, Deep vein thrombosis; ECMO, extracorporeal membrane oxygenation; HIT, Heparin-induced thrombocytopenia; PE, Pulmonary embolism; RRT, renal replacement therapy.

**Table S3. Laboratory results in COVID-19 patients who required mechanical ventilation and those who did not**

|                               | No mechanical ventilation<br>N=42 | Mechanical ventilation<br>N=30 | p value |
|-------------------------------|-----------------------------------|--------------------------------|---------|
| Creatinine mg\dl (Max) (N=72) | 0.98 (0.80-1.77)                  | 1.81 (1.07-3.44)               | 0.003   |
| WBC K\micl (N=71)             | 5.62 (4.59-7.27)                  | 8.75 (6.53-13.84)              | 0.002   |
| WBC K\micl (Min) (N=71)       | 5.19±1.82                         | 5.45±2.12                      | 0.516   |
| WBC K\micl (Max) (N=71)       | 8.19 (5.95-11.30)                 | 19.98 (13.96-33.20)            | <0.001  |
| % Lympho (N=71)               | 16.45 (14.15-21.30)               | 9.90 (6.30-15.80)              | 0.005   |
| Hb g\dl (Min) (N=72)          | 12.22 (9.83-13.09)                | 7.08 (6.78-8.26)               | <0.001  |
| PLT K\micl (Min) (N=72)       | 161.5 (144.5-192)                 | 118.5 (67.2-164.7)             | 0.005   |
| CRP g\dl (N=71)               | 70.8 (24.6-126.6)                 | 114.9 (70.5-243.5)             | 0.013   |
| CRP g\dl (Max) (N=72)         | 107.8 (67.4-210.2)                | 329.7 (285.0-401.0)            | <0.001  |
| PCT µg\l (N=41)               | 0.83 (0.47-1.79)                  | 0.47 (0.32-0.92)               | 0.147   |
| PCT µg\l (Max) (N=47)         | 1.09 (0.54-3.28)                  | 4.56 (1.88-14.27)              | 0.004   |
| ALT U\l (N=71)                | 24.5 (17-32.7)                    | 41.0 (27.0-58.0)               | <0.001  |
| AST U\l (N=71)                | 35.5 (28.2-50.5)                  | 60.0 (42.0-95.0)               | <0.001  |
| LDH U\l (N=71)                | 288.5 (227.2-398.0)               | 449.0 (357.0-676.0)            | <0.001  |
| Triglycerides mg\dl (N=38)    | 148.0 (113.5-185.8)               | 187.0 (143.8-289.0)            | 0.035   |
| Troponin ng\ml (N=66)         | 9.5 (4.7-13.7)                    | 13.2 (9.8-36.5)                | 0.015   |
| D-dimer ng\ml (N=62)          | 695.0 (495.0-1200.0)              | 1425.5 (649.5-3682.5)          | 0.021   |
| D-dimer max ng\ml (N=69)      | 1007.0 (573.2-5569.8)             | 22726 (8195-47938)             | <0.001  |
| Fibrinogen mg\dl (Min) (N=61) | 439.35±170.39                     | 231.83±131                     | <0.001  |
| CPK U\l (N=42)                | 106.5 (61.0-227.0)                | 162.5 (64.0-272.2)             | 0.930   |
| TNF pg\ml (N=15)              | 22 (17-38.2)                      | 28 (24.5-38)                   | 0.571   |
| TNF pg\ml (Max) (N=31)        | 29.5±22.27                        | 31.44±12.43                    | 0.844   |
| IL8 pg\ml (N=15)              | 105 (81-262.2)                    | 52 (33-94.5)                   | 0.104   |
| IL8 pg\ml (Max) (N=31)        | 75 (36.7-114)                     | 56 (43-97)                     | 0.783   |
| IL 1B pg\ml (N=15)            | 0.5 (0.0-1.0)                     | 1.0 (0.0-1.0)                  | 0.721   |
| IL 1B pg\ml (Max) (N=31)      | 0.00 (0.00-0.75)                  | 1.00 (0.00-1.00)               | 0.383   |
| IL6 pg\ml (N=15)              | 48.0 (34.7-65.5)                  | 186.0 (79.0-369.0)             | 0.078   |
| IL6 pg\ml (Max) (N=32)        | 36.0 (26.5-60.5)                  | 193.0 (86.0-657.0)             | 0.001   |

Mean±SD; values upon admission if not stated otherwise. Abbreviations: WBC – White blood count, Lympho - Lymphocytes, Hb – Hemoglobin, PLT – Platelets, CRP - C-reactive protein, PCT – Procalcitonin, ALP - Alkaline Phosphatase, GGT - Gamma Glutamyl Transpeptidase, ALT - Alanine transaminase, AST - Aspartate Aminotransferase, LDH - Lactate Dehydrogenase, CPK - creatine phosphokinase, TNF - Tumor necrosis factor, IL8 - Interleukin 8, IL-1B - interleukin 1, beta, IL 6 - Interleukin 6

**Table S4. Correlations between ACE2 and other biomarkers associated with disease severity in COVID-19**

| <b>Variables Correlated with ACE2</b> | <b>Correlation Coefficient</b> | <b>p value</b> |
|---------------------------------------|--------------------------------|----------------|
| Creatinine mg\dl (Max) (N=65)         | -0.018                         | 0.886          |
| WBC K\micl (N=64)                     | 0.379                          | 0.002          |
| WBC K\micl (Min) (N=64)               | 0.378                          | 0.002          |
| WBC K\micl (Max) (N=64)               | 0.271                          | 0.031          |
| % Lympho (N=64)                       | -0.414                         | <0.001         |
| Hb g\dl (Min) (N=65)                  | -0.118                         | 0.349          |
| PLT K\micl (Min) (N=65)               | 0.259                          | 0.037          |
| CRP g\dl (N=64)                       | 0.494                          | <0.001         |
| CRP g\dl (Max) (N=65)                 | 0.302                          | 0.014          |
| PCT µg\l (N=35)                       | 0.465                          | 0.005          |
| PCT µg\l (Max) (N=40)                 | 0.348                          | 0.028          |
| ALT U\l (N=64)                        | 0.296                          | 0.018          |
| AST U\l (N=64)                        | 0.310                          | 0.013          |
| LDH U\l (N=64)                        | 0.457                          | <0.001         |
| Triglycerides mg\dl (N=34)            | 0.245                          | 0.162          |
| Troponin ng\ml (N=60)                 | 0.229                          | 0.078          |
| D-dimer ng\ml (N=56)                  | 0.470                          | <0.001         |
| D-dimer max ng\ml (N=62)              | 0.293                          | 0.021          |
| Fibrinogen mg\dl (Min) (N=54)         | -0.015                         | 0.912          |
| CPK U\l (N=40)                        | -0.093                         | 0.566          |
| TNF pg\ml (N=14)                      | 0.312                          | 0.277          |
| TNF pg\ml (Max) (N=26)                | 0.196                          | 0.337          |
| IL8 pg\ml (N=14)                      | -0.081                         | 0.785          |
| IL8 pg\ml (Max) (N=26)                | 0.093                          | 0.650          |
| IL 1B pg\ml (N=14)                    | 0.178                          | 0.542          |
| IL 1B pg\ml (Max) (N=26)              | 0.204                          | 0.317          |
| IL6 pg\ml (N=14)                      | 0.147                          | 0.616          |
| IL6 pg\ml (Max) (N=27)                | 0.273                          | 0.168          |

**Table S5. *TMPRSS2* at an early disease stage is not an independent predictor of mechanical ventilation in COVID-19**

|                                     | OR     | 95% CI       | P-value |
|-------------------------------------|--------|--------------|---------|
| <b>TMPRSS1 (Above 2 vs Below 2)</b> | 4.626  | 0.393-54.414 | 0.223   |
| <b>Age</b>                          | 0.828  | 0.728-0.941  | 0.004   |
| <b>Gender (Male vs Female)</b>      | 1.819  | 0.163-20.261 | 0.626   |
| <b>Acute renal failure*</b>         | 38.920 | 2.809-539.37 | 0.006   |

\*Acute renal failure – increase in creatinine from baseline in 50%

Abbreviations: OR = odds ratio, CI = confidence interval, ACE2 - Angiotensin converting enzyme 2



**Table S6. ACE2 and TMPRSS2 serum levels late in the disease course in COVID-19 patients**

|                           | ACE2 –<br>second sample        |                                | p value | TMPRSS2 –<br>second sample    |                               | p value      |
|---------------------------|--------------------------------|--------------------------------|---------|-------------------------------|-------------------------------|--------------|
|                           | No<br>mean±SD<br>(n)           | Yes<br>mean±SD<br>(n)          |         | No<br>mean±SD<br>(n)          | Yes<br>mean±SD<br>(n)         |              |
| <b>MV*</b>                | 8.85 (4.23-<br>11.92)<br>(9)   | 11.54 (8.00-<br>14.41)<br>(21) | 0.298   | 1.97 (0.54-<br>4.03)<br>(9)   | 6.53 (2.66-<br>20.11)<br>(21) | <b>0.045</b> |
| <b>LOS<br/>&gt;7 days</b> |                                | 10.05 (7.60-<br>13.81)<br>(30) | NA      |                               | 4.46 (1.32-<br>9.96)<br>(30)  | NA           |
| <b>CCCU stay</b>          | 8.85 (4.23-<br>11.92)<br>(9)   | 11.5 (8.00-<br>14.41)<br>(21)  | 0.298   | 1.97 (0.54-<br>4.03)<br>(12)  | 6.53 (2.66-<br>20.11)<br>(18) | <b>0.045</b> |
| <b>Sepsis</b>             | 9.0 (4.13-<br>13.59)<br>(12)   | 10.98 (8.12-<br>13.72)<br>(18) | 0.626   | 3.79 (0.54-<br>6.67)<br>(15)  | 5.67 (1.69-<br>18.57)<br>(15) | 0.249        |
| <b>AKI*</b>               | 11.92 (8.24-<br>13.86)<br>(15) | 9.67 (5.64-<br>13.21)<br>(15)  | 0.507   | 4.80 (1.26-<br>13.44)<br>(21) | 4.41 (1.34-<br>6.77)<br>(9)   | 0.806        |
| <b>CVVH</b>               | 10.42 (8.09-<br>14.41)<br>(21) | 9.67 (3.82-<br>12.45)<br>(9)   | 0.342   | 4.80 (1.97-<br>10.5)<br>(25)  | 2.66 (0.94-<br>7.01)<br>(5)   | 0.449        |
| <b>Dialysis</b>           | 9.59 (7.47-<br>14.41)<br>(25)  | 11.54 (9.67-<br>12.45)<br>(5)  | 0.978   | 4.51 (1.97-<br>8.34)<br>(25)  | 1.37 (0.28-<br>21.98)<br>(5)  | 0.666        |
| <b>ECMO</b>               | 11.54 (8.47-<br>14.41)<br>(25) | 7.47 (3.82-<br>8.00)<br>(5)    | 0.101   | 4.03 (1.31-<br>10.5)<br>(20)  | 7.01 (4.41-<br>7.61)<br>(10)  | 0.589        |
| <b>Mortality</b>          | 11.73 (8.66-<br>14.59)<br>(20) | 8.24 (4.73-<br>11.76)<br>(10)  | 0.159   | 5.10 (1.80-<br>20.58)<br>(20) | 2.94 (1.04-<br>6.00)<br>(10)  | 0.120        |

\*MV – Mechanical Ventilation; AKI - Acute renal failure – increase in creatinine from baseline in 50%, Abbreviations: ACE2 – Angiotensin converting enzyme 2, TMPRSS2 - transmembrane serine protease 2, ARF – acute renal failure, ECMO – extracorporeal membrane oxygenation, LOS – length of stay, mechanically ventilated, CVVH – continuous veno-venous hemofiltration.

**Table S7. *ACE2/TMPRSS2* ratio does not predict the risk for mechanical ventilation in COVID-19 patients**

| Outcomes       |     | ACE2/TMPRSS2 Ratio | p-value |
|----------------|-----|--------------------|---------|
| Intubated      | Yes | 0.84 (0.34-2.46)   | 0.477   |
|                | No  | 1.08 (0.68-5.35)   |         |
| AKI            | Yes | 1.19 (0.47-9.29)   | 0.261   |
|                | No  | 0.91 (0.34-2.05)   |         |
| Dialysis/CVVH  | Yes | 2.07 (0.76-7.87)   | 0.248   |
|                | No  | 1.03 (0.34-2.37)   |         |
| CCCU Admission | Yes | 0.90 (0.34-2.75)   | 0.671   |
|                | No  | 1.04 (0.58-4.75)   |         |
